# Supplementary material
Source: PubMed Central journal article supplement (PMC2854645)
Supplement: NIHMS188307-supplement-1_si_001.pdf [file NIHMS188307-supplement-1_si_001.pdf]

# Comparative Glycomics using A Tetraplex Stable-Isotope Coded Tag

Michael J. Bowman and Joseph Zaia\*

Boston University School of Medicine, Department of Biochemistry, Center for  
Biomedical Mass Spectrometry, Boston, MA 02118

Supporting Information

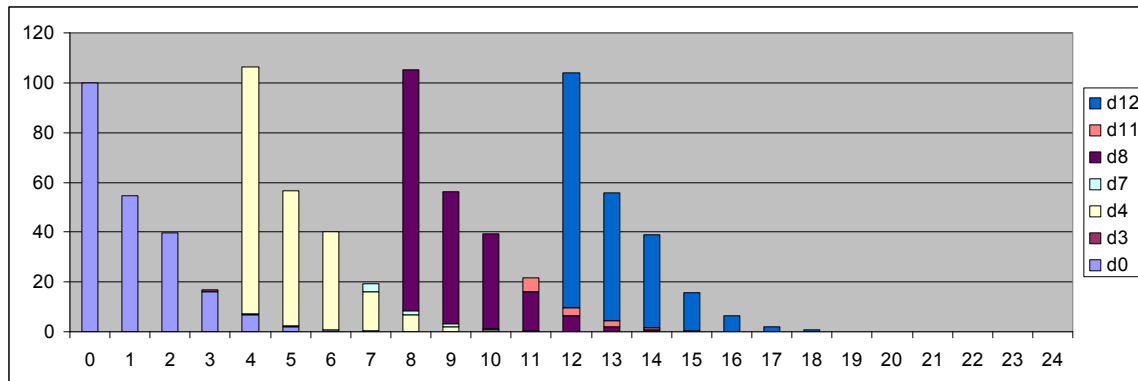

Figure S.1.:Isotopic envelopes with overlaps, corrected for any tag isotopic deficiency for labeled [1,1,2,4,1]

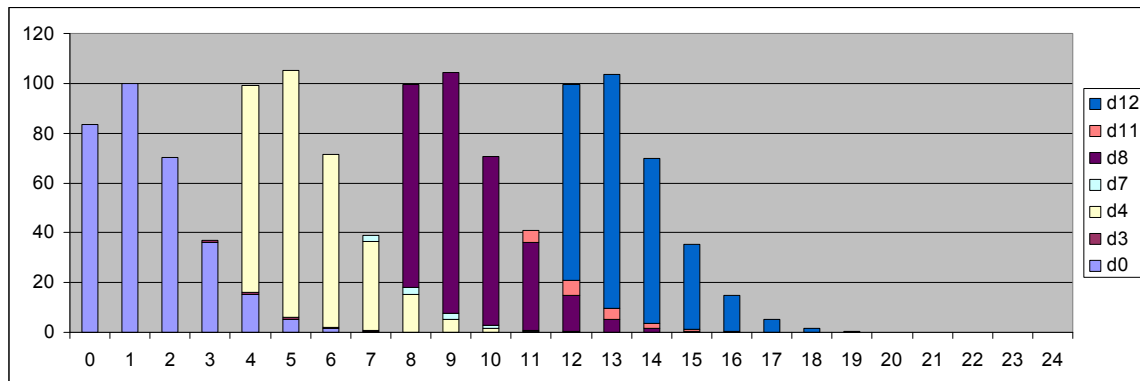

Figure S.2. Isotopic envelopes with overlaps, corrected for any tag isotopic deficiency for labeled BiAnNeu<sub>2</sub>

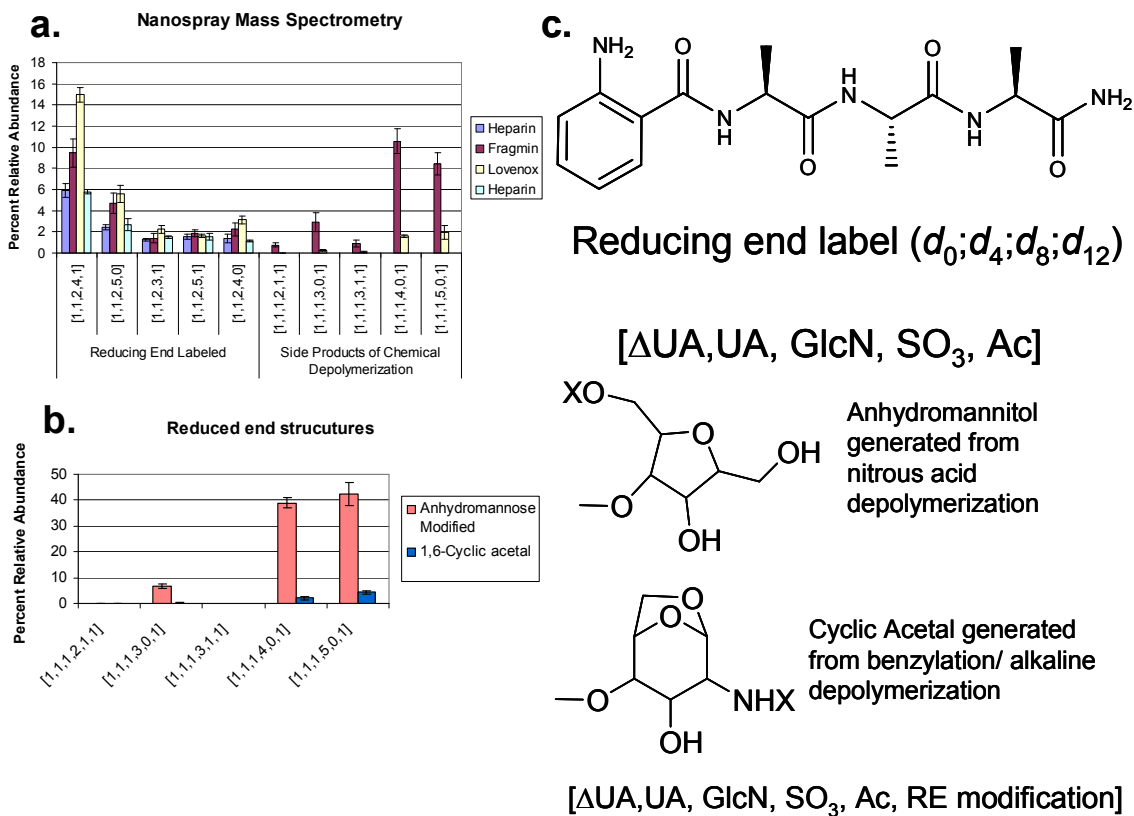

Figure S.3. Relative quantification of tetrasaccharides with modified reducing ends from pharmaceutical preparation by a.) nanospray and b.) LC/MS. c.) Reducing end structures.

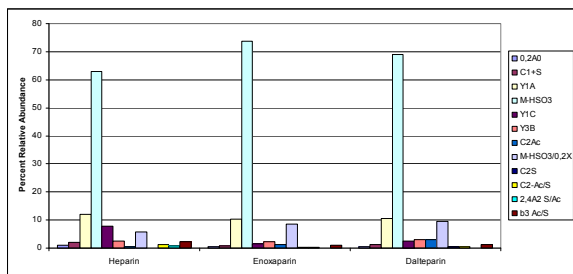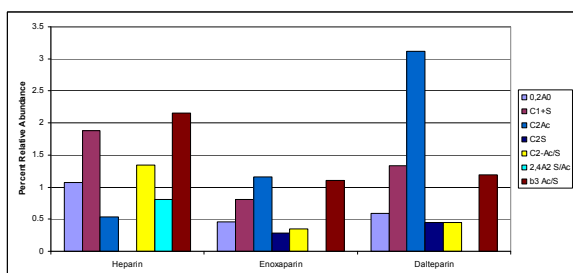

Figure S.4. Relative abundances of non-reducing end fragments of [1,1,2,4,1] labeled heparin-based tetrasaccharides. Each ion ( $d_0$ ,  $d_4$ , and  $d_8$ ) were isolated individually and fragmented to determine the contribution of non-isotopically enriched fragment ions from each source.

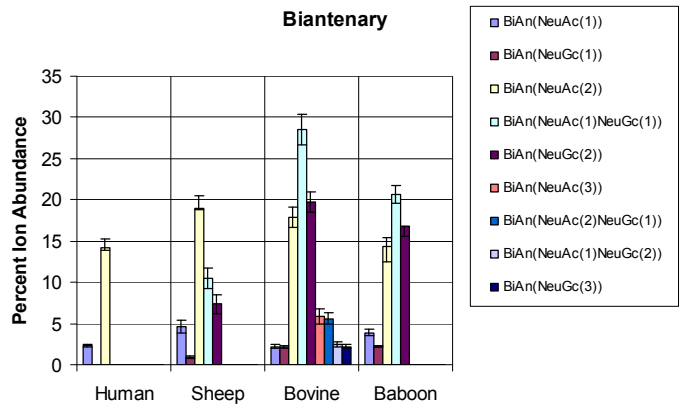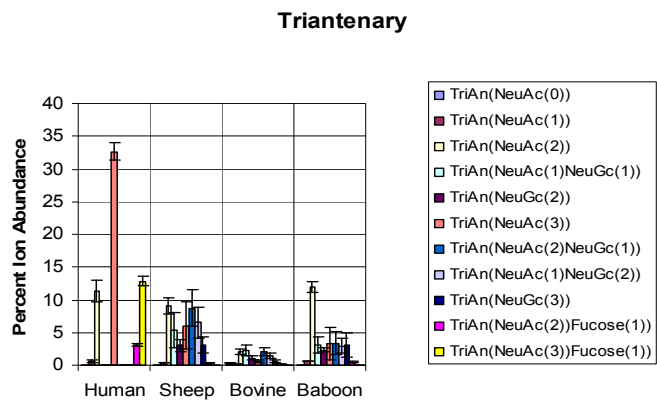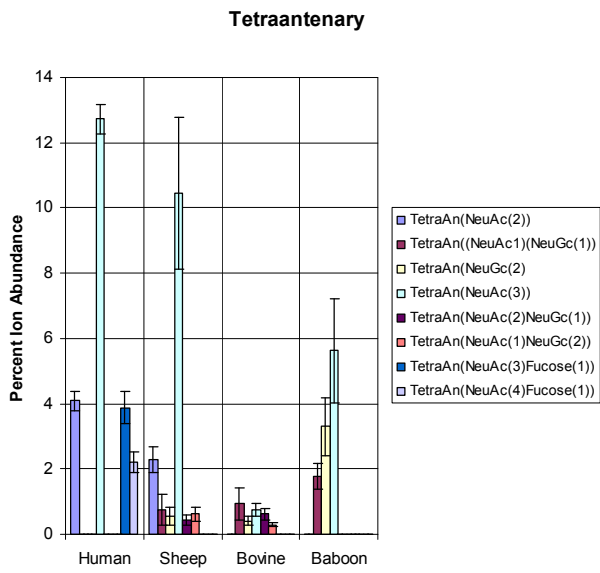

Figure S.5. *N*-linked graphs by percent ion abundance by class normalized for protein content.

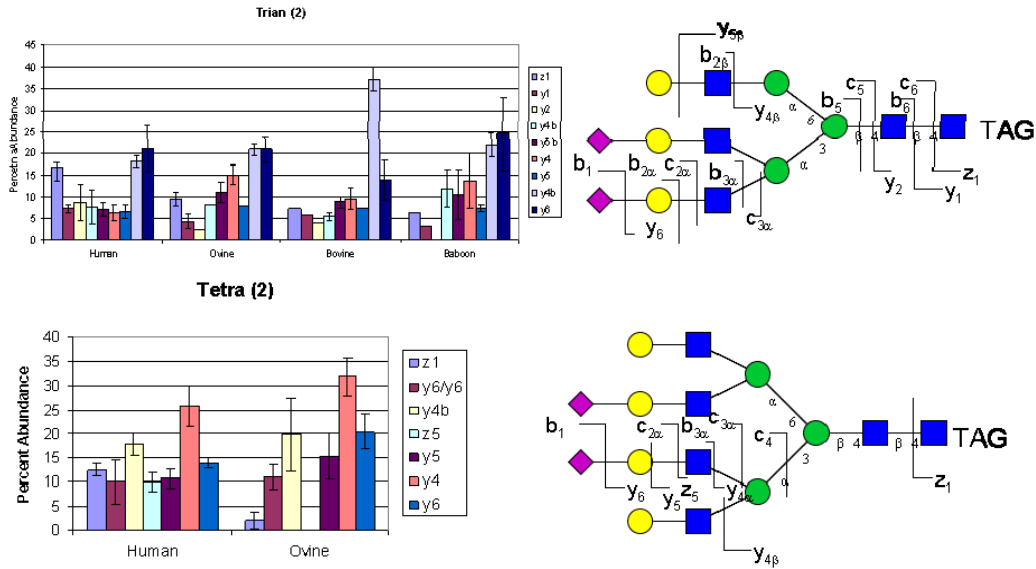

Figure S.6. Relative quantification of fragment ions of relative quantification of fragment ions from TriAn(NeuAc<sub>2</sub>)<sup>3-</sup> and TetraAn(NeuAc<sub>2</sub>)<sup>3-</sup>. The locations of the sialic acids in the representative structures are for illustrative purposes, as sialic acid positions were not determined.
